# Supplementary material
Source: PubMed Central journal article supplement (PMC3179127)
Supplement: 1109546108_pnas.201109546SI.pdf [file 1109546108_pnas.201109546SI.pdf]

# Supporting Information

Sun et al. 10.1073/pnas.1109546108

## SI Materials and Methods

**RNA Isolation, Quantitative PCR, and Real-Time PCR.** Cellular RNA was prepared from skeletal muscle or C2C12 cells using TRIzol reagent (Invitrogen), and real-time PCR was performed with iQ SYBR Green Supermix using the iCycler iQ real-time PCR detection system (Bio-Rad).

Primers for the different isoforms of NADPH oxidase (Nox) were:

Nox1 forward: ACCTGCTCATTGCAACCGTA  
Nox1 reverse: AGAGATCCATCCATGGCCTGTT  
Nox2 forward: CGACAAGGATTCGAAGACAACCTG  
Nox2 reverse: AATACCGGTCAGAAATCCCCGACT  
Nox3 forward: CAGTCGGAACCTCATTTCCTGTT  
Nox3 reverse: AGGTGATAACGCTCCAGGTTGAA  
Nox4 forward: CATGGTGGTGGTATTGTTCCCTCA  
Nox4 reverse: GCCAGGAGGGTGAGTGTCTACAT  
Dual oxidase (Duox) 1 forward: TATTTGAGGGGAGTG-  
GATTTGG  
Duox1 reverse: CCCTACAAGCTTCTCCGACATGA  
Duox2 forward: GTGTGCGCTGTTACTGTGATTG  
Duox2 reverse: CCATCACTGGCTGTTGTTTCTT.

**Western Blot Analysis.** Samples were separated by SDS/PAGE on 4–12% gradient gels and blotted to nitrocellulose membrane. Ryanodine receptor–Ca<sup>2+</sup> release channel (RyR1) and Nox4 were detected, respectively, with anti-ryanodine receptor (anti-RyR) mouse monoclonal antibody (Clone 34C; (Affinity Bio-Reagents) and one of two anti-Nox4 polyclonal antisera (rabbit: ThermoScientific; goat: Santa Cruz).

**Coimmunoprecipitation.** Rabbit sarcoplasmic reticulum (SR) vesicles were solubilized in 50 mM Tris (pH 7.4), 0.9% NaCl, 10  $\mu$ M Ca<sup>2+</sup>, and 0.5% Triton X-100 (Sigma-Aldrich) with protease inhibitors before incubation overnight at 4 °C with mouse monoclonal anti-RyR1 antibody (as above), followed by incubation with protein G Sepharose (Amersham Biosciences) for 1 h. Following elution and Western blotting, RyR1 was detected with the immunoprecipitating antibody, and Nox4 was detected with goat polyclonal antiserum (Santa Cruz).

**Immunohistochemistry.** Rat hind-limb extensor muscle was sectioned at 8- $\mu$ m thickness on a cryostat, and slide-mounted sections were fixed by immersion in 4% paraformaldehyde, washed, permeabilized with 0.1% Triton X-100 in PBS, and blocked with 1% goat serum in PBS. Sections then were incubated overnight with anti-Nox4 rabbit polyclonal antibody (provided by David Lambeth, Emory University, Atlanta, GA) or anti-RYR1 mouse monoclonal antibody (as above) followed by, respectively, Alexa Fluor 488-conjugated goat anti-rabbit IgG or Alexa Fluor 546-conjugated goat anti-mouse IgG (Molecular Probes) for 1 h. Stained sections were analyzed by confocal scanning-laser microscopy (Zeiss LSM510).

**siRNA-Mediated Knockdown of Nox4 in C2C12 Cells.** C2C12 cells were grown in DMEM (Gibco) containing 10% FBS and penicillin/streptomycin, then were transferred to Opti-MEM medium without serum (Gibco), and were transfected by electroporation with 500 nM Nox4 siRNA or scrambled control siRNA (Dharmacon). Cells were allowed to reach confluency, after which they were transferred to DMEM containing 2% horse serum for differentiation to myotubes and myofibers. Microsomal fractions

were isolated from differentiated cells scraped from tissue culture plates using the same scheme of differential centrifugation as used to generate the microsomal fraction from skeletal muscle (*Materials and Methods*).

**Assay of Intracellular Ca<sup>2+</sup> Release: C2C12 Cells.** C2C12 cells were grown on coverslips (40-mm diameter) and allowed to differentiate for 9 d after siRNA transfection. Myotubes then were loaded for 30 min with the Ca<sup>2+</sup> indicators Fluo 3-AM (5  $\mu$ M) and Fura Red (10  $\mu$ M) in DMEM and 0.06% pluronic acid F127. For measurement at controlled partial pressure of O<sub>2</sub> (pO<sub>2</sub>), coverslips were placed in a closed, live-cell imaging chamber under a continuous flow of DMEM/50 mM Tris-HCl (pH 7.4) that was preadjusted with O<sub>2</sub> (1% or 20%), 5% CO<sub>2</sub>, remainder N<sub>2</sub> to the specified pO<sub>2</sub> (10 mm Hg or 150 mm Hg). Ca<sup>2+</sup> release was induced by depolarization with 50 mM KCl (final concentration) in DMEM. Ca<sup>2+</sup>-induced fluorescence was imaged with a confocal scanning-laser microscope (Zeiss LSM510), and signal strength was quantified as F1 (peak Fluo 3 signal)/F0 (baseline Fluo 3 signal). Fura Red fluorescence was monitored to confirm the Ca<sup>2+</sup> dependence of Fluo 3 signals.

**Construction and Administration of Nox4 shRNA-Adeno-Associated Virus Vector.** Origene plasmids (pRS series) containing the U6 promoter sequence and one of two shRNAs targeting mouse Nox4 (sequence A: ATCCAGCTGTACCTCAGTCAAACA-GATCG; sequence B: AACACCTCTGCTGCTCATTGCGC-TGTCC) or a scrambled negative control (GCACTACCAGA-GCTAACTCAGATAGTACT) were obtained and validated for knockdown of Nox4. The neomycin gene present in the pTRUFr plasmid (1) was removed via BstBI and BclI digestion and blunt-ended. The blunted EcoRI/SalI fragment (containing the U6 promoter-shRNA cassette) from each Origene plasmid was used to replace the neomycin gene in pTRUFr. The resulting adeno-associated virus (AAV) plasmids contained the Nox4 shRNA expression cassette as well as a CMV-GFP cassette. The integrity of the U6-shRNA cassette was confirmed by HindIII digestion as well as by DNA sequencing. Recombinant AAV serotype 6 (rAAV6) Nox4 shRNA vectors were produced using procedures as reviewed (2). Briefly, HEK-293 cells were cotransfected with plasmids encoding AAV rep-cap (pXR-6), adenovirus helper XX6-80, and individual AAV Nox4 shRNA plasmids. Cells were harvested 48–72 h posttransfection and were lysed by freeze-thawing. rAAV was isolated by two sequential cesium gradient centrifugations. Each fraction was monitored following gradient centrifugation by dot blot or by infecting HeLa cells and then by assessing GFP expression with fluorescence microscopy. AAV then was concentrated and titered by dot blot. For each mouse, the left and right hind-limbs were injected with  $1.3 \times 10^{11}$  viral particles containing either Nox4 or control scrambled shRNA. Injections were percutaneous and targeted the gastrocnemius muscle using a 28-gauge needle and 50- $\mu$ L injection volume. After 4 wk (a survival interval determined by examining the time-course of knockdown in preliminary experiments), extensor digitorum longus (EDL) muscles were removed for bioassay, and the extent of Nox4 knockdown in each muscle was assessed by Western blotting for Nox4 after bioassay. In addition, GFP expression and RyR1 protein level also were assessed by Western blotting. Muscles without detectable GFP expression or exhibiting more than twofold increased RyR1 expression ( $n = 2$ ) were excluded from analysis.

**Data Analysis.** Data were analyzed with one-way or two-way ANOVA with an appropriate post hoc test for comparison of

multiple groups or unpaired student's *t* test for comparison between two groups.

1. Haberman RP, McCown TJ, Samulski RJ (1998) Inducible long-term gene expression in brain with adeno-associated virus gene transfer. *Gene Ther* 5:1604–1611.

2. Grieger JC, Choi VW, Samulski RJ (2006) Production and characterization of adeno-associated viral vectors. *Nat Protoc* 1:1412–1428.

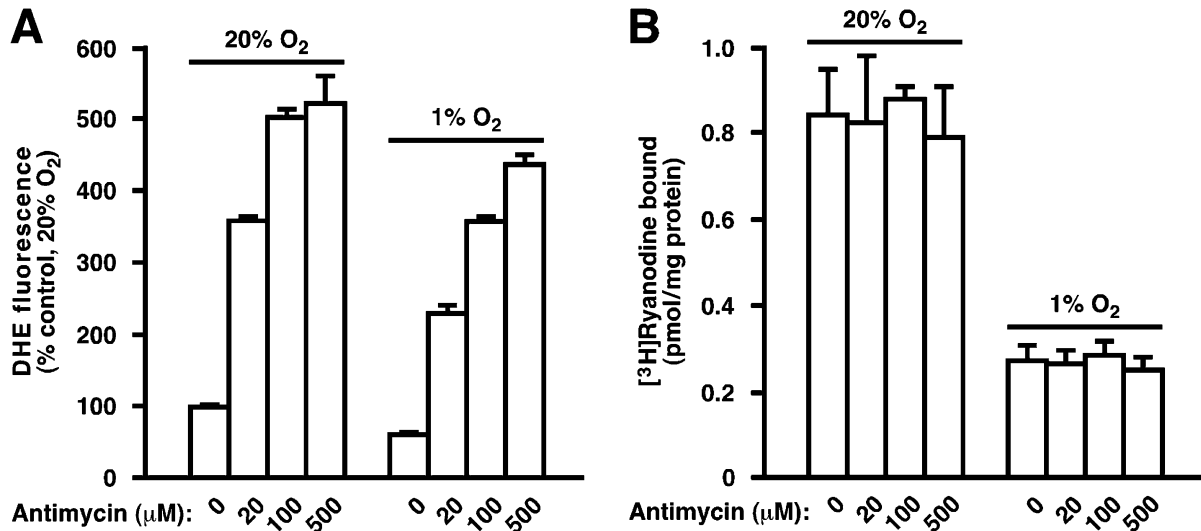

**Fig. S1.** A subpopulation of mitochondria is intimately associated with the SR (1). (A) ROS production by mitochondria is increased in the presence of the uncoupling agent antimycin A (2), and exposure to antimycin A resulted in dose-dependent increases in ROS production by SR vesicles at both high and low pO<sub>2</sub> as assessed by dihydroethidium (DHE) fluorescence. (B) Strikingly, however, no change in RyR1 activity was associated with antimycin A treatment as assessed by [<sup>3</sup>H]-ryanodine binding (*n* = 4–6).

1. Rossi D, Barone V, Giacomello E, Cusimano V, Sorrentino V (2008) The sarcoplasmic reticulum: An organized patchwork of specialized domains. *Traffic* 9:1044–1049.

2. Chen Q, Vazquez EJ, Moghaddas S, Hoppel CL, Lesnefsky EJ (2003) Production of reactive oxygen species by mitochondria: Central role of complex III. *J Biol Chem* 278:36027–36031.

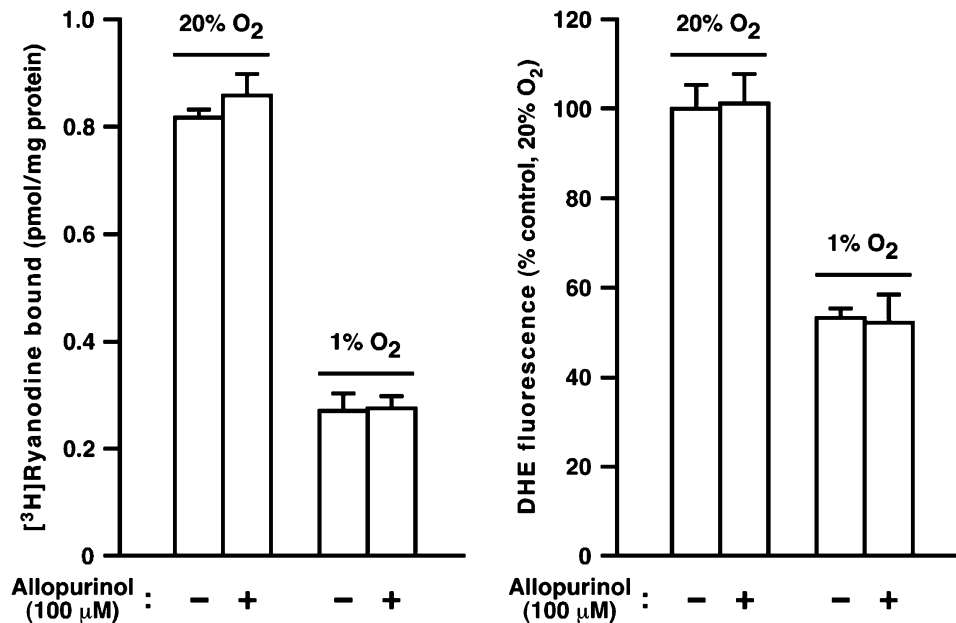

**Fig. S2.** In SR vesicles isolated from rabbit hind-limb muscle, incubation with the xanthine oxidase inhibitor allopurinol had no effect on the activity of the ryanodine receptor/Ca<sup>2+</sup> channel as assessed by [<sup>3</sup>H]ryanodine binding (*Left*) or on production of reactive oxygen species (ROS) as assessed by DHE-derived fluorescence (*Right*), at either low pO<sub>2</sub> (1% O<sub>2</sub>) or high pO<sub>2</sub> (20% O<sub>2</sub>).







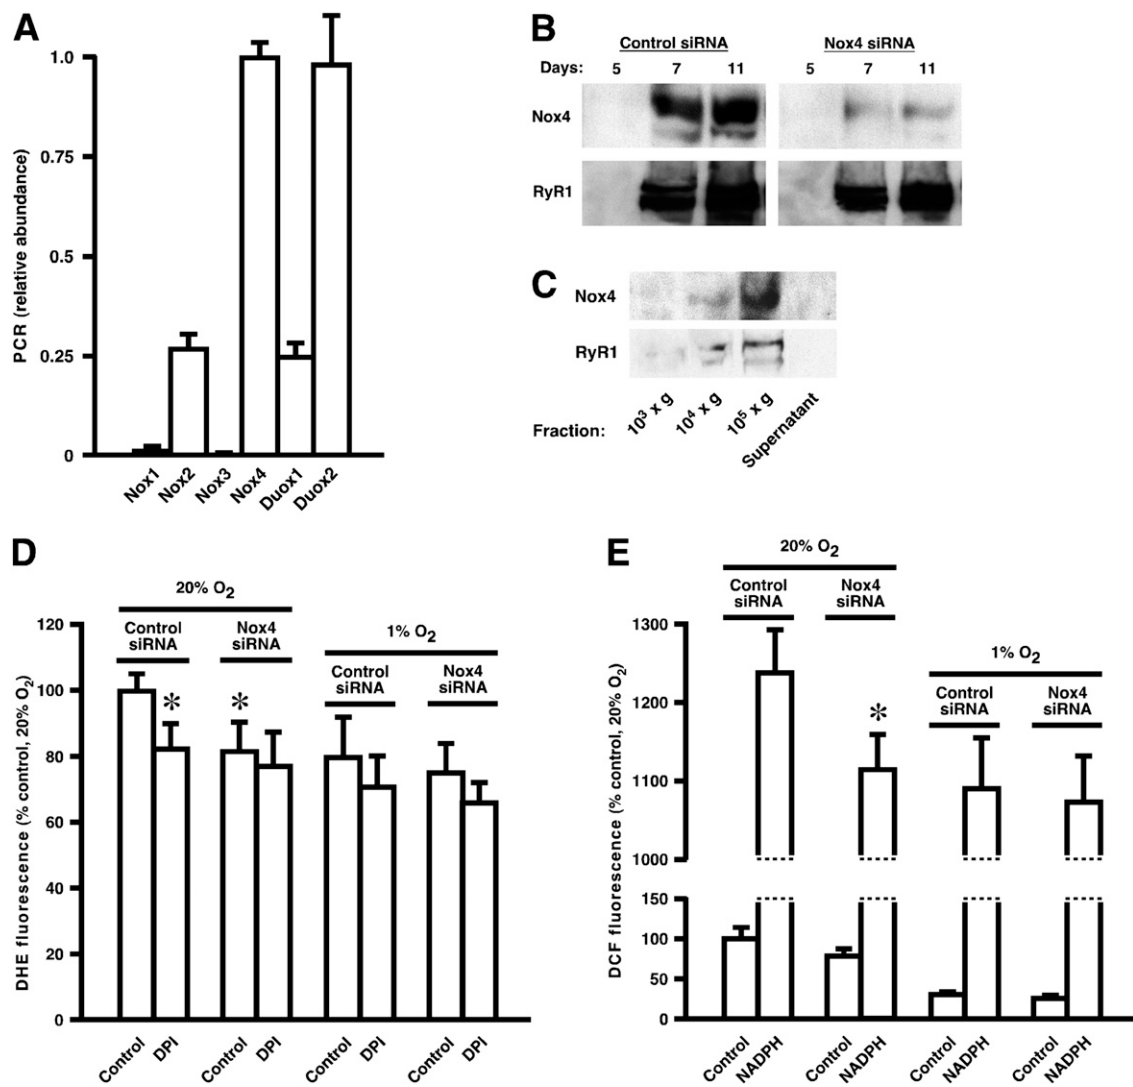

**Fig. S6.** ROS generated by Nox4 mediate pO<sub>2</sub>-dependent regulation of RyR in C2C12 cells. (A) In differentiated C2C12 cells, Nox4 is relatively abundant as assessed by PCR. (B) A representative Western blot illustrates coexpression of Nox4 and RyR as C2C12 cells differentiate in culture and near-total suppression of Nox4 expression by treatment with a Nox4-specific siRNA (with no effect on RyR expression). Note that C2C12 cells express RyR3 as well as RyR1 (1) and that RyR3, which has a higher gel mobility than RyR1 (2), also is detected by the antibody used. (C) Subcellular fractionation of differentiated C2C12 cells shows that Nox4 and RyR1 are most abundant in the microsomal (100,000 × g) fraction. (D) Production of ROS by the microsomal fraction (assessed by DHE fluorescence) was enhanced at high versus low pO<sub>2</sub>, and this enhancement was abrogated by DPI (20 μM) and by siRNA-mediated knockdown of Nox4 (*n* = 4). (E) Production of H<sub>2</sub>O<sub>2</sub> by the microsomal fraction [assessed by 2',7'-dichlorofluorescein (DCF) fluorescence] is enhanced at high versus low pO<sub>2</sub> and by the addition of NADPH (1 mM), and enhancement is abrogated by siRNA-mediated knockdown of Nox4 (*n* = 4). \**P* < 0.05 versus control siRNA at 20% O<sub>2</sub>.

- Wang Y, et al. (2006) Knocking down type 2 but not type 1 calsequestrin reduces calcium sequestration and release in C2C12 skeletal muscle myotubes. *J Biol Chem* 281:15572–15581.
- Murayama T, Ogawa Y (1997) Characterization of type 3 ryanodine receptor (RyR3) of sarcoplasmic reticulum from rabbit skeletal muscles. *J Biol Chem* 272:24030–24037.
